# Supplementary material
Source: Springer Nature journal article supplement (https://www.springermedizin.de/resource/supplementary/12889_2009_1688_MOESM2_ESM.pdf/9503732)

Per cent

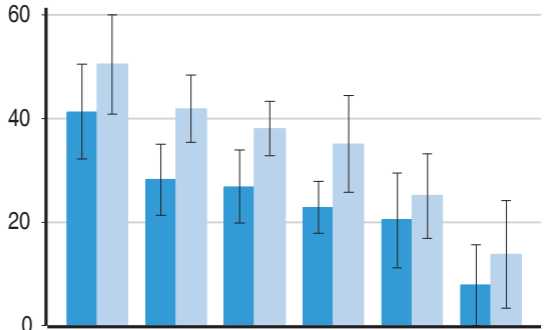

18-24 25-34 35-44 45-54 55-64 65+

Age group (years)

■ Males      ■ Females

Supplement: MOESM2 [file 9503732]
